# Supplementary material
Source: publisher site journal article supplement (https://www.dovepress.com/article/328238)

# OB_ELISA

| **Tests of Normality** | | | | | | | |
| --- | --- | --- | --- | --- | --- | --- | --- |
|  | Group | Kolmogorov-Smirnova | | | Shapiro-Wilk | | |
|  | Statistic | df | Sig. | Statistic | df | Sig. |
| OB_ELISA | OB | .178 | 8 | .200* | .937 | 8 | .577 |
| OVX | .182 | 8 | .200* | .939 | 8 | .600 |
| Sham | .232 | 8 | .200* | .836 | 8 | .068 |
| *. This is a lower bound of the true significance. | | | | | | | |
| a. Lilliefors Significance Correction | | | | | | | |


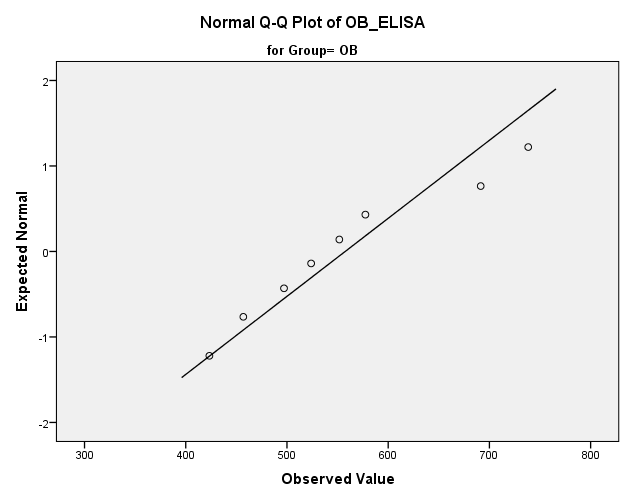


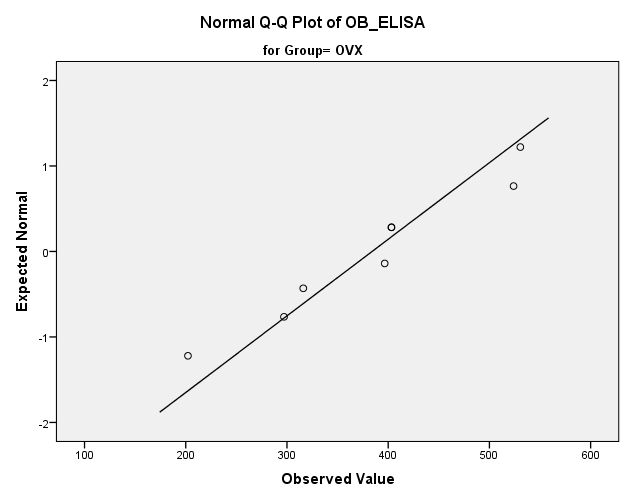


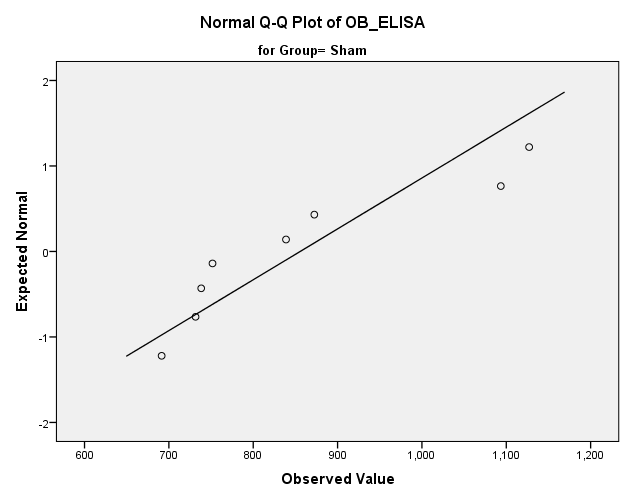


# OB-section

| **Tests of Normality** | | | | | | | |
| --- | --- | --- | --- | --- | --- | --- | --- |
|  | Group | Kolmogorov-Smirnova | | | Shapiro-Wilk | | |
|  | Statistic | df | Sig. | Statistic | df | Sig. |
| OB_section | OB | .258 | 8 | .126 | .871 | 8 | .153 |
| OVX | .232 | 8 | .200* | .935 | 8 | .566 |
| Sham | .252 | 8 | .145 | .901 | 8 | .294 |
| *. This is a lower bound of the true significance. | | | | | | | |
| a. Lilliefors Significance Correction | | | | | | | |


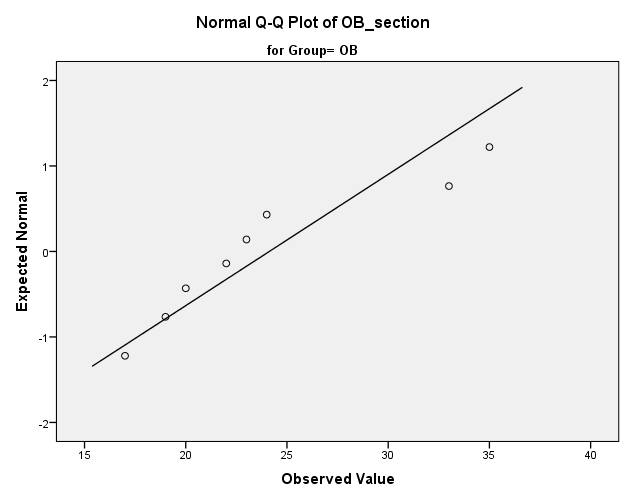


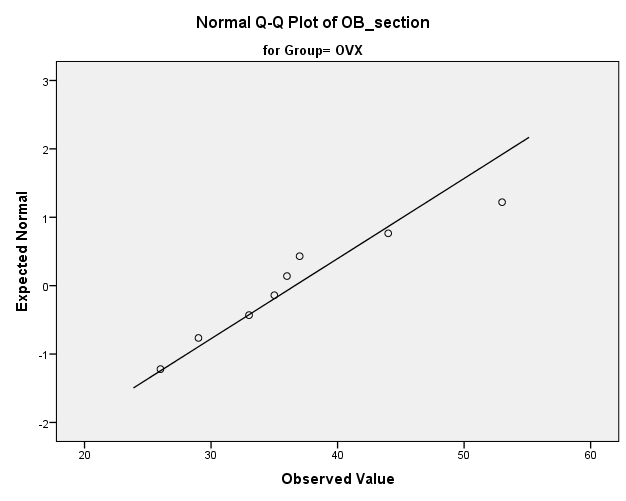


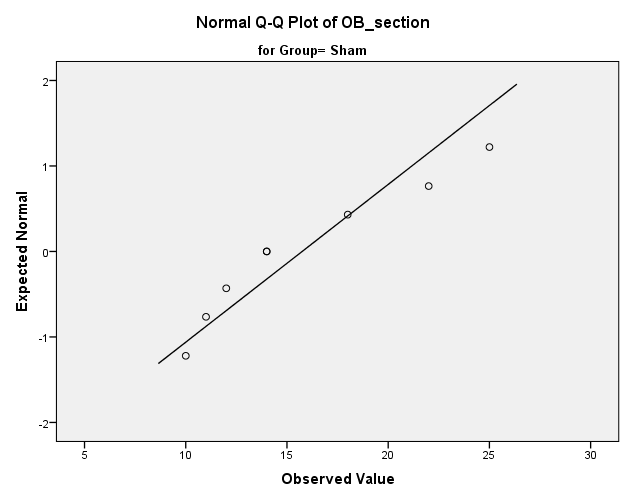


# OB-uCT

| **Tests of Normality** | | | | | | | |
| --- | --- | --- | --- | --- | --- | --- | --- |
|  | Group | Kolmogorov-Smirnova | | | Shapiro-Wilk | | |
|  | Statistic | df | Sig. | Statistic | df | Sig. |
| OB_uCT | OB | .284 | 8 | .057 | .782 | 8 | .019 |
| OVX | .205 | 8 | .200* | .898 | 8 | .278 |
| Sham | .255 | 8 | .134 | .860 | 8 | .121 |
| *. This is a lower bound of the true significance. | | | | | | | |
| a. Lilliefors Significance Correction | | | | | | | |


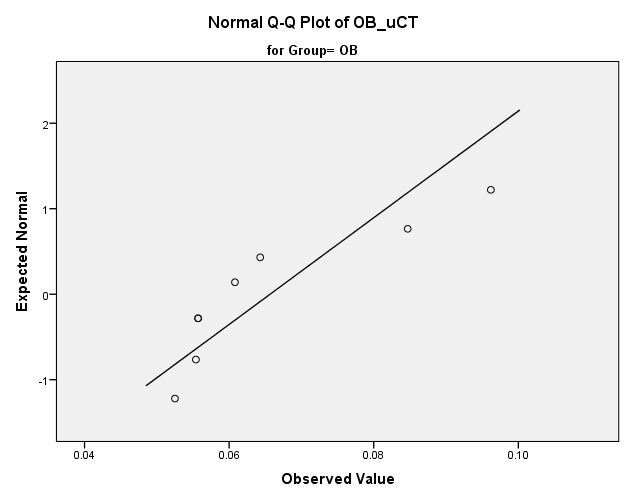


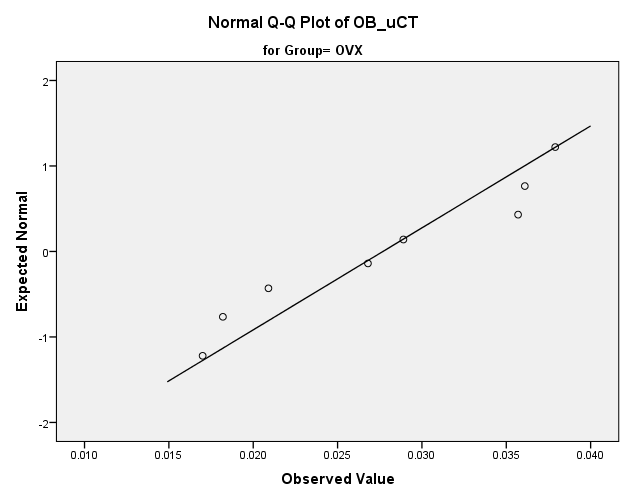


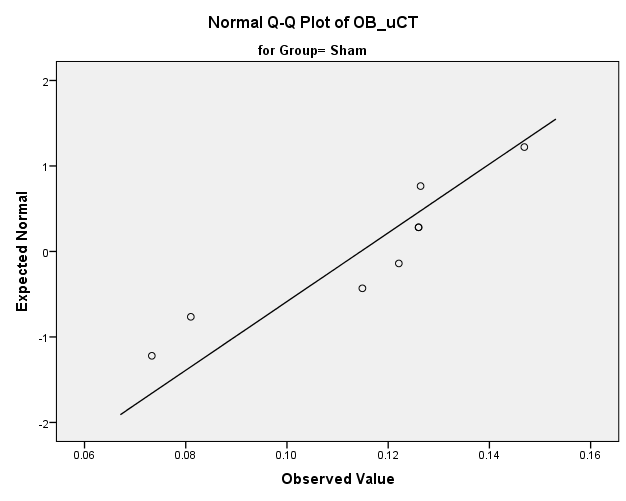

Supplement: Supplementary file 1 [file get_supplementary_file.php]
